# Supplementary material for: Filling the gaps in the research about second primary malignancies after bladder cancer: Focus on race and histology
Source: Front Public Health. 2022 Nov 17;10:1036722. doi: 10.3389/fpubh.2022.1036722 (PMC9713240; doi:10.3389/fpubh.2022.1036722)
Supplement: Supplementary file 1 [file Table_1.XLSX]

## Sheet: Table_1
SPM cases by race using the IRR, with 95% CI; only p>0.001 are mentioned
Variable		Whites		Blacks		Asian/ Pacific islanders
		n	IRR (95%CI)	n	IRR (95%CI)	n	IRR (95%CI)
Sex	Male	24330	ref	1213	ref	864	ref
	Female	4769	0.89	373	1.4	197	1.04
			(0.86-0.92)		(1.24-1.57)		(0.89- 1.21)
							P= 0.654
Age	35-59	4927	ref	389	ref	146	ref
	60-69	9674	1.21	576	0.91	316	1.33
			(1.17-1.25)		(0.80-1.04)		(1.09-1.62)
					P= 0.156		P=0.004
	70-84	14498	1.53	621	0.83	599	2.13
			(1.48-1.58)		(0.73-0.94)		(1.78-2.55)
					P= 0.004
Year	2000-2004	11057	ref	545	ref	327	ref
	2005-2009	9547	1.25	529	1.4	382	1.69
			(1.22-1.28)		(1.25-1.58)		(1.46-1.96)
	2010-2014	6048	1.99	355	2.37	232	2.58
			(1.93-2.05)		(2.07-2.71)		(2.18-3.05)
	2015-2018	2447	4.35	157	5.66	120	7.21
			(4.16-4.54)		(4.74-6.76)		(5.85-8.89)
Histology	transitional	28416	ref	1513	ref	1018	ref
	Squamous	310	1.02	21	1.3	11	1.01
			(0.92-1.12)		(0.85- 2.00)		(0.56- 1.84)
			P= 0.673		P= 0.228		P=0.962
	Epithelial	166	1.39	18	2.84	15	3.51
			(1.20-1.62)		(1.78-4.52)		(2.11- 5.85)
	Adenomas	126	1.05	21	1.05	13	3.03
			(0.88-1.25)		(0.89-1.25)		(1.75- 5.23)
			P= 0.579
	Others	81	1.35	13	3.29	4	1.86
			(1.08-1.68)		(2.14-5.06)		(0.70- 4.96)
			P= 0.007				P=0.216
Stage	In situ	16521	ref	804	ref	570	ref
	Localized	10135	1.14	589	1.37	393	1.29
			(1.12-1.17)		(1.23-1.52)		(1.13-1.46)
	Regional	2207	1.83	162	2.76	80	1.92
			(1.75-1.91)		(2.33-3.26)		(1.52-2.43)
	Distant	236	2.31	31	6.23	18	5.1
			(2.03-2.62)		(4.35-8.92)		(3.19-8.16)
Grade	I	4468	ref	228	ref	105	ref
	II	9746	1.02	487	0.99	342	1.52
			(1.05-0.98)		(0.85- 1.16)		(1.22- 1.89)
			P= 0.407		P=0.940
	III	6418	1.17	370	1.32	239	1.86
			(1.13-1.22)		(1.12- 1.56)		(1.48- 2.34)
					P= 0.001­­
	IV	8467	1.5	501	1.74	375	2.83
			(1.45-1.56)		(1.49- 2.04)		(2.28- 3.51)
Radiation	No/Unknown	28528	ref	1536	ref	1033	ref
	Yes	571	1.53	50	2.49	28	2.07
			(1.41-1.66)		(1.88- 3.29)		(1.42- 3.01)
Chemo-therapy	No/Unknown	24170	ref	1317	ref	848	ref
	Yes	4929	1.42	269	1.42	213	1.75
			(1.38-1.47)		(1.25- 1.62)		(1.51- 2.04)
Latency	1-5 years	10871	ref	667	ref	414	ref
	>5 years	18228	0.26	889	0.2	647	0.24
			(0.25-0.27)		(0.18- 0.22)		(0.21- 0.27)

## Sheet: Table_S1
SIRs by sites
	White	White	White	Black	Black	Black	Asian or Pacific Islander	Asian or Pacific Islander	Asian or Pacific Islander
	SIR	CI Lower	CI Upper	SIR	CI Lower	CI Upper	SIR	CI Lower	CI Upper
All Sites	1.69#	1.67	1.71	1.94#	1.85	2.04	2.15#	2.02	2.29
All Solid Tumors	1.80#	1.78	1.82	2.06#	1.96	2.17	2.30#	2.15	2.45
Oral Cavity and Pharynx	0.97	0.87	1.06	1.08	0.63	1.73	1.15	0.61	1.96
Pharynx	1.31#	1.03	1.65	1	0.27	2.57	1.46	0.47	3.4
Esophagus	1.20#	1.06	1.35	0.54	0.17	1.25	1.73	0.79	3.29
Stomach	1.15#	1.03	1.28	1.08	0.68	1.64	1.27	0.85	1.84
Colon and Rectum	1.01	0.96	1.06	0.87	0.68	1.1	1.14	0.87	1.45
Liver	1.20#	1.07	1.34	1.55#	1.03	2.24	1.3	0.88	1.86
Gallbladder	0.96	0.67	1.33	2.11	0.69	4.92	1.01	0.12	3.64
Pancreas	1.13#	1.04	1.23	1.44#	1.03	1.96	1.23	0.78	1.85
Lung and Bronchus	1.92#	1.86	1.97	2.11#	1.86	2.37	1.91#	1.62	2.24
Bones and Joints	0.83	0.44	1.41	1.95	0.05	10.85	0	0	8.93
Melanoma of the Skin	0.78#	0.73	0.84	2.51	0.68	6.44	2.80#	1.13	5.78
Breast	0.93#	0.87	1	0.97	0.71	1.29	1.56#	1.08	2.18
Cervix Uteri	1.27	0.83	1.86	2.12	0.69	4.95	1.88	0.23	6.81
Corpus and Uterus, NOS	0.87	0.74	1.03	0.63	0.25	1.31	0.95	0.26	2.42
Prostate	2.24#	2.19	2.29	2.14#	1.95	2.33	2.45#	2.15	2.79
Kidney and Renal Pelvis	2.09#	1.98	2.21	2.49#	1.95	3.13	4.35#	3.35	5.56
Ureter	15.09#	13.78	16.48	37.10#	22.66	57.3	19.88#	12.46	30.09
Brain and Other Nervous System	0.89	0.75	1.04	1.38	0.5	2.99	0.56	0.07	2.01
Thyroid	1.12	0.96	1.3	2.11#	1.06	3.78	1.72	0.82	3.16
All Lymphatic and Hematopoietic Diseases	0.98	0.93	1.03	0.9	0.68	1.17	0.98	0.7	1.33
all excluding bladder	1.52#	1.5	1.54	1.67#	1.58	1.77	1.82#	1.7	1.94
				Confidence intervals are 95%.
				# = P < 0.05
